# Supplementary material
Source: Springer Nature journal article supplement (https://www.springermedizin.de/resource/supplementary/12888_2011_969_MOESM4_ESM.pdf/9479704)
Supplement: MOESM4 [file 9479704]

**Table 2. Brief summary table**

| <b>Conclusions</b>                 | <b>Total number of studies (n)</b> | <b>Re-evaluation studies</b> | <b>Registry studies</b> |
|------------------------------------|------------------------------------|------------------------------|-------------------------|
| 0 – 10 % under-reporting           | 7                                  | 4                            | 3                       |
| Fairly reliable suicide statistics | 6                                  | 3                            | 3                       |
| 11 – 30 % under-reporting          | 4                                  | 4                            | 0                       |
| > 30 % under-reporting             | 10                                 | 9                            | 1                       |
| Poor suicide statistics            | 2                                  | 1                            | 1                       |

The two combined re-evaluation and registry studies are in this table registered as registry studies.

The two studies where they exchanged data between countries (Ross O. et al. and Atkinson M.W. et al.) are not included in this table.
